# Supplementary material for: Modulating spin dynamics of cyclic LnIII-radical complexes (LnIII = Tb, Dy) by using phenyltrifluoroacetylacetonate coligand
Source: Royal Society of Chemistry journal article supplement (doi:10.1039/c2dt11671e), 2012-01-01
Supplement: c2dt11671e.pdf [file c2dt11671e.pdf]

## Supporting Information

### Modulating spin dynamics of cyclic Ln<sup>III</sup>-radical complexes (Ln<sup>III</sup> = Tb, Dy) by using phenyltrifluoroacetate coligand

Xue-Lan Mei, Rui-Na Liu, Chao Wang, Pei-Pei Yang, Li-Cun Li\*, Dai-Zheng Liao

Department of Chemistry and Key Laboratory of Advanced Energy Materials

Chemistry, Nankai University, Tianjin 300071, PR China

**Table S1.** Selected bond lengths (Å) and bond angles (deg) for complexes **1-3**.

|                                                          | Complex 1  | Complex 2  | Complex 3  | [Tb(hfac) <sub>2</sub> (NITpPy) <sub>2</sub> ]           |            |
|----------------------------------------------------------|------------|------------|------------|----------------------------------------------------------|------------|
| Ln1-O1(Phtfac)                                           | 2.340(3)   | 2.329(4)   | 2.316(5)   | Tb1-O3(hfac)                                             | 2.365(4)   |
| Ln1-O2(Phtfac)                                           | 2.359(3)   | 2.346(4)   | 2.327(5)   | Tb1-O4(hfac)                                             | 2.345(4)   |
| Ln1-O3(Phtfac)                                           | 2.347(4)   | 2.336(4)   | 2.332(5)   | Tb1-O7(hfac)                                             | 2.329(4)   |
| Ln1-O4(Phtfac)                                           | 2.374(3)   | 2.364(4)   | 2.356(4)   | Tb1-O8(hfac)                                             | 2.361(4)   |
| Ln1-O5(Phtfac)                                           | 2.346(3)   | 2.318(4)   | 2.314(5)   | Tb1-O6(hfac)                                             | 2.344(4)   |
| Ln1-O6(Phtfac)                                           | 2.340(3)   | 2.328(4)   | 2.320(4)   | Tb1-O5(hfac)                                             | 2.350(4)   |
| Ln1-O7(Rad)                                              | 2.431(3)   | 2.426(4)   | 2.406(4)   | Tb1-O1(Rad)                                              | 2.364(4)   |
| Ln1-N3                                                   | 2.619(4)   | 2.609(5)   | 2.596(5)   | Tb1-N1                                                   | 2.593(4)   |
| N1-O7                                                    | 1.281(5)   | 1.288(6)   | 1.284(7)   | N2-O1                                                    | 1.291(6)   |
| N2-O8                                                    | 1.276(5)   | 1.286(6)   | 1.273(7)   | N3-O2                                                    | 1.262(6)   |
| O7-Ln1-N3                                                | 101.72(12) | 102.05(14) | 102.34(16) | O1-Tb1-N1                                                | 104.34(13) |
| N1-O7-Ln1                                                | 138.7(3)   | 139.2(3)   | 139.6(4)   | N2-O1-Tb1                                                | 138.5(3)   |
| N1-C37-N2                                                | 109.1(4)   | 107.8(5)   | 108.4(6)   | N3-C6-N2                                                 | 108.9(4)   |
| O1-Ln1-N3                                                | 76.02(12)  | 76.10(14)  | 76.04(18)  | O3-Tb1-N1                                                | 80.61(13)  |
| O2-Ln1-N3                                                | 143.28(12) | 143.36(14) | 143.74(17) | O4-Tb1-N1                                                | 143.44(14) |
| O3-Ln1-N3                                                | 81.60(12)  | 81.54(15)  | 81.38(18)  | O7-Tb1-N1                                                | 81.25(14)  |
| O4-Ln1-N3                                                | 76.93(12)  | 76.61(14)  | 76.69(17)  | O8-Tb1-N1                                                | 72.45(14)  |
| O5-Ln1-N3                                                | 69.75(11)  | 69.78(14)  | 69.67(17)  | O6-Tb1-N1                                                | 71.45(13)  |
| O6-Ln1-N3                                                | 141.50(12) | 141.64(14) | 141.68(19) | O5-Tb1-N1                                                | 141.33(14) |
| The shortest Ln...Ln distance<br>between the dimer units | 9.389      | 9.397      | 9.439      | The shortest Ln...Ln distance<br>between the dimer units | 10.714     |

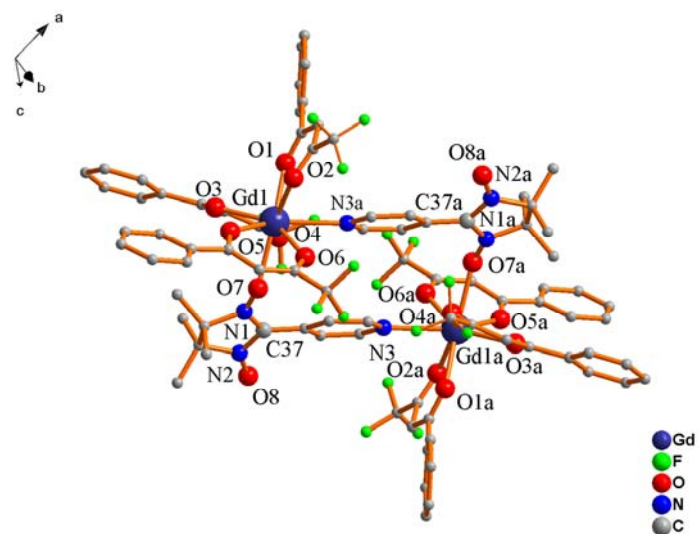

**Fig. S1.** The molecular structure of **1**. H atoms are not shown for the sake of clarity.

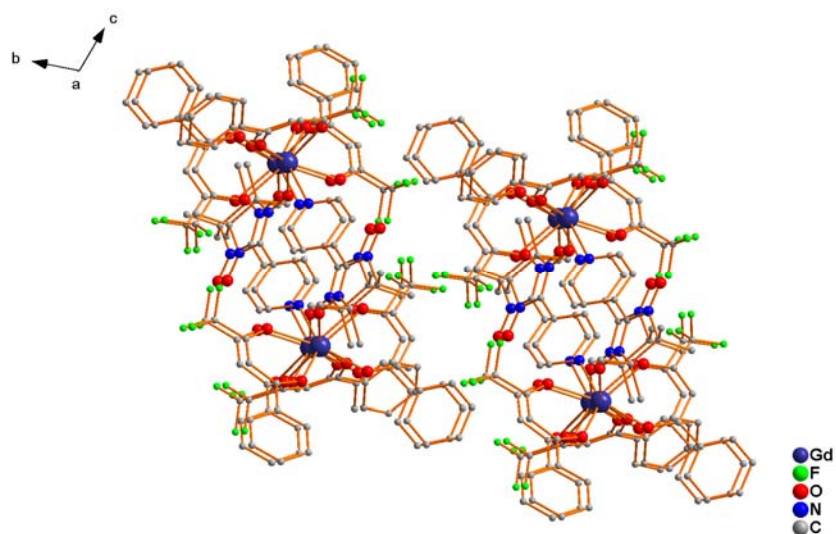

**Fig. S2.** Packing diagram of complex **1**. H atoms are not shown for the sake of clarity.

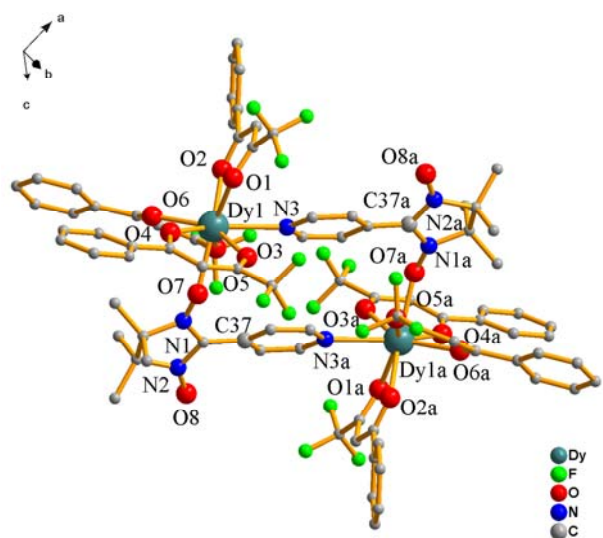

**Fig. S3.** The molecular structure of **3**. H atoms are not shown for the sake of clarity.

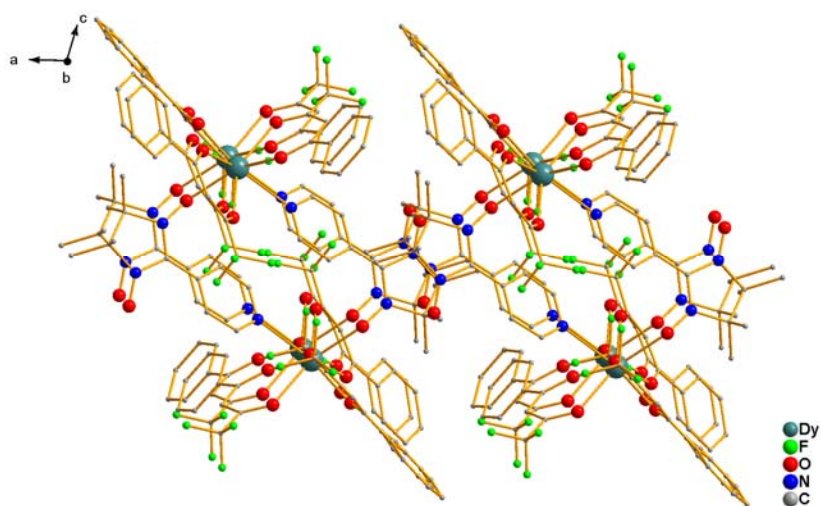

**Fig. S4.** Packing diagram of complex **3**. H atoms are not shown for the sake of clarity.

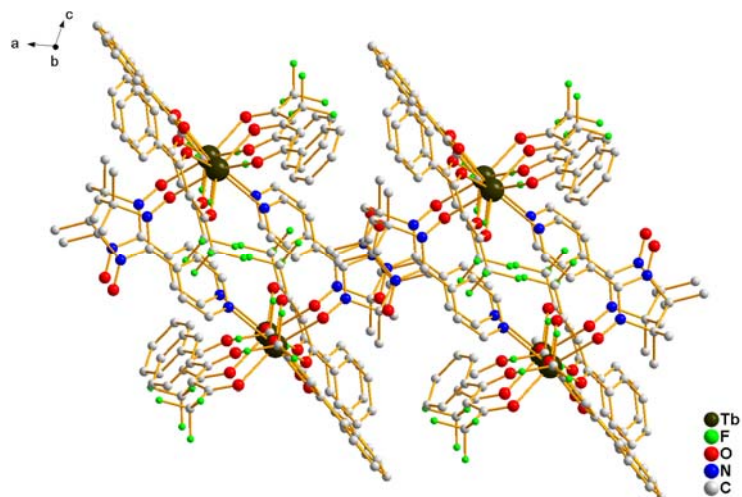

**Fig. S5.** Packing diagram of complex 2. H atoms are not shown for the sake of clarity.

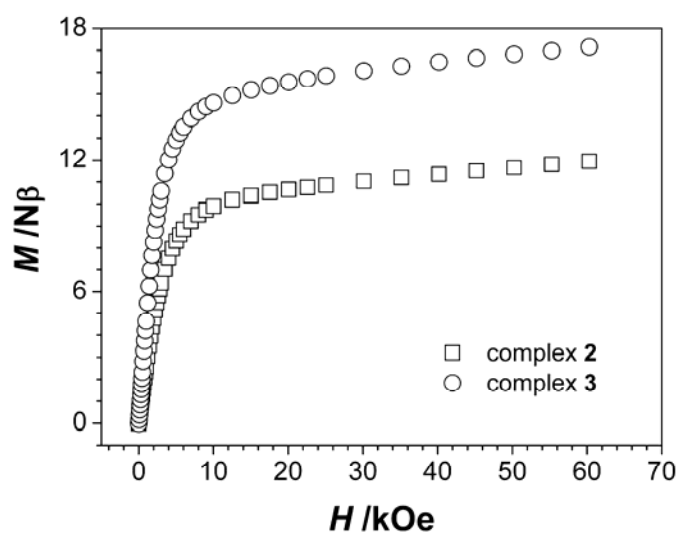

**Fig. S6.**  $M$  versus  $H$  plots for 2 and 3 at 2.0 K.

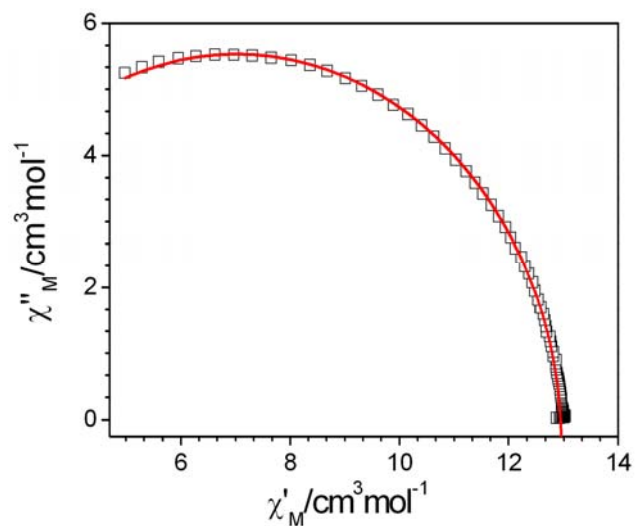

**Fig. S7.** The Cole–Cole plot at 3 K of **2** in zero-dc field. The red solid line represents the best fitting results obtained with a Debye model.

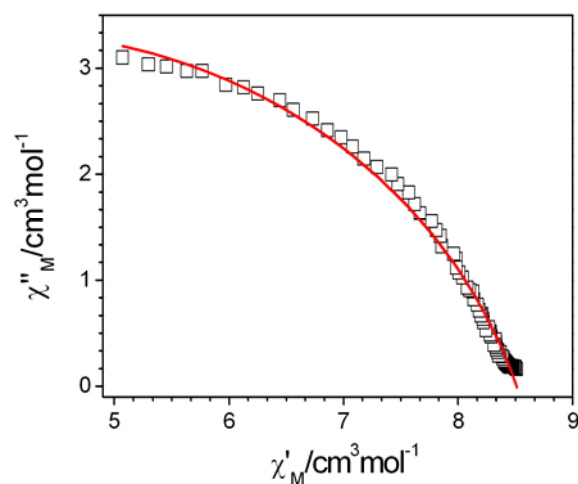

**Fig. S8.** The Cole–Cole plot at 5 K of **3** in 3 kOe dc field. The red solid line represents the best fitting results obtained with a Debye model.

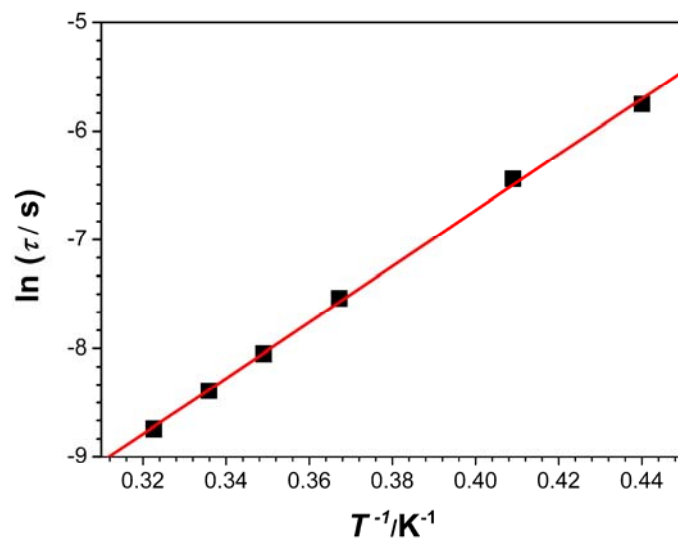

**Fig. S9.**  $\ln\tau$  vs.  $1/T$  plot for **2**. The solid line represents the least-squares fit of the experimental data to Arrhenius law.

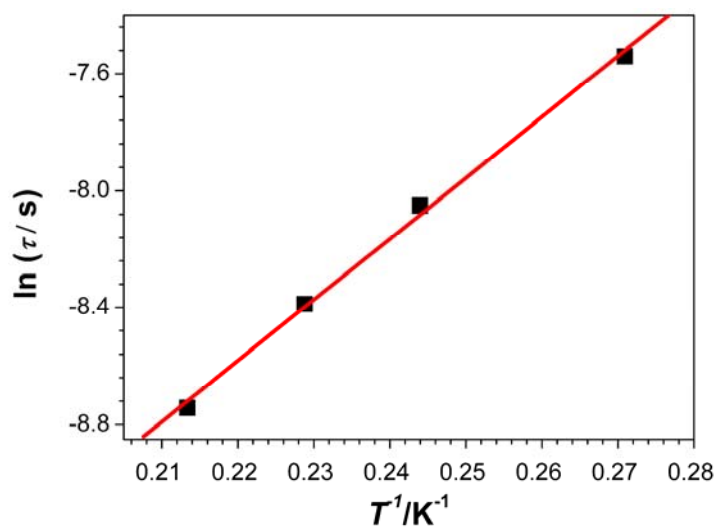

**Fig. S10.**  $\ln\tau$  vs.  $1/T$  plot for **3**. The solid line represents the least-squares fit of the experimental data to Arrhenius law.
